# Supplementary material for: Can adaptations of crop and soil management prevent yield losses during water scarcity? – A modelling study
Source: Copernicus journal article supplement (doi:10.5194/egusphere-2024-1201), 2024-05-13
Supplement: Supplementary file 1 [file egusphere-2024-1201-supplement.pdf]

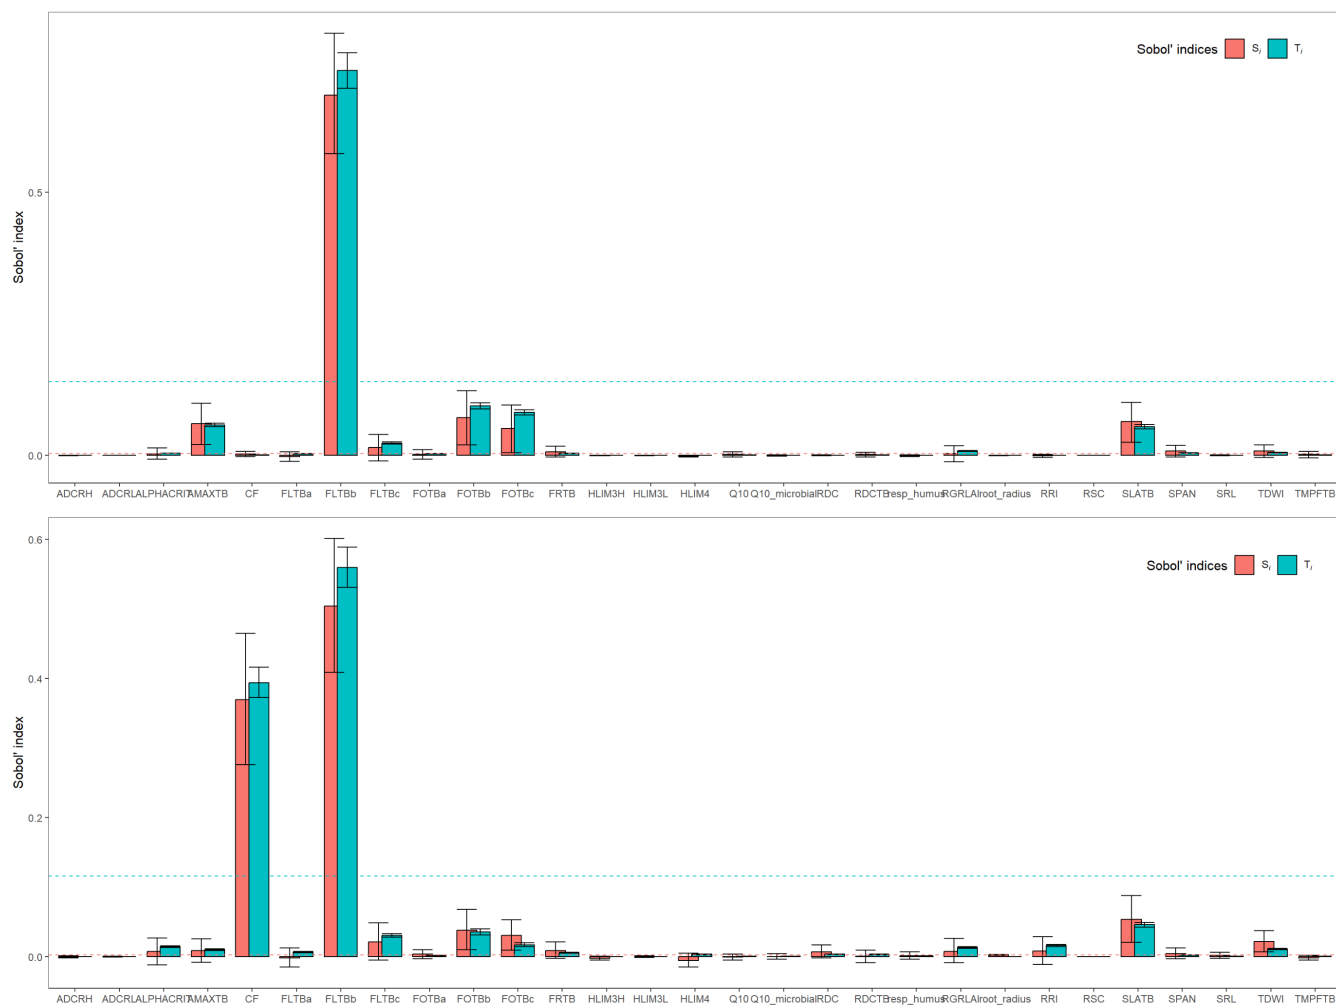

**Figure S1.** Sobol Indices for all tested parameters with respect to crop yield (top) and seasonal irrigation amounts (bottom)). Barplots show the uncertainty (%) that each parameter conveys. By bootstrapping the Sobol' indices, we derive the confidence intervals (Puy et al., 2022). Red bars for individual and blue bar for total effects (parameter interactions). Horizontal line indicates threshold for significance. As the model is non-additive, the variance cannot be fully composed of the first-order effects of the parameters and parameter interactions play a role.

**Table S1.** All 29 parameters tested in the GSA with definition, default value and the upper and lower ranges used in the analysis.

| Parameter           | Definition                                                                                                          | Unit                                           | Default value | Lower range | Upper range |
|---------------------|---------------------------------------------------------------------------------------------------------------------|------------------------------------------------|---------------|-------------|-------------|
| CF                  | crop factor for DVS=0 (for DVS=1, CF*1.1)                                                                           |                                                | 1             | 0.85        | 1.15        |
| RSC                 | minimum canopy resistance                                                                                           | s m <sup>-1</sup>                              | 100           | 85          | 115         |
| TDWI                | initial crop dry weight                                                                                             | kg ha <sup>-1</sup>                            | 75            | 64          | 86          |
| RGR <sub>LAI</sub>  | maximum relative increase in LAI                                                                                    | m <sup>2</sup> m <sup>-2</sup> d <sup>-1</sup> | 0.0120        | 0.0108      | 0.0132      |
| SPAN                | life span of leaves (optimum)                                                                                       | d                                              | 37            | 33          | 41          |
| SL <sub>ATB</sub>   | specific leaf area for DVS=0 (for DVS=2, SL <sub>ATB</sub> *0.5)                                                    | ha kg <sup>-1</sup>                            | 0.0030        | 0.0027      | 0.00330     |
| AMAX <sub>XTB</sub> | max. CO <sub>2</sub> assimilation rate                                                                              | kg ha <sup>-1</sup> h <sup>-1</sup>            | 30            | 25.5        | 34.5        |
| Q10                 | doubles the maintenance respiration for each 10 degrees increase in temperature.                                    |                                                | 2             | 1.7         | 2.3         |
| HLIM1               | no extraction at higher pressure heads                                                                              | cm                                             | -10           | -8.5        | -11.5       |
| HLIM2U              | h below which optim. Water extraction starts for top layer                                                          | cm                                             | -25           | -21.25      | -28.75      |
| HLIM2L              | h below which optim. Water extraction starts for sublayer                                                           | cm                                             | -25           | -21.25      | -28.75      |
| HLIM3H              | h below which water uptake starts at high atmospheric demand                                                        | cm                                             | -300          | -255        | -345        |
| HLIM3L              | h below which water uptake starts at low transpiration                                                              | cm                                             | -500          | -425        | -575        |
| HLIM4               | h at wilting point                                                                                                  | cm                                             | -10000        | -8500       | -11500      |
| ADCRH               | level of high atmospheric demand (HLIM3H)                                                                           | cm d <sup>-1</sup>                             | 0.50          | 0.43        | 0.58        |
| ADCRL               | level of low atmospheric demand (HLIM3L)                                                                            | cm d <sup>-1</sup>                             | 0.10          | 0.09        | 0.12        |
| ALPHACRI            | Critical stress index to compensate root water uptake                                                               |                                                | 1             | 0.85        | 1.15        |
| RRI                 | ma. Daily increase in rooting depth                                                                                 | cm d <sup>-1</sup>                             | 1.20          | 1.02        | 1.38        |
| RDC                 | max. rooting depth of crop                                                                                          | cm                                             | 50            | 42.5        | 57.5        |
| RDCTBa              | RDCTB = root density as function of rel. rooting depth (here RDCTB = RDCTBa*ln(x) + 0.9966)                         |                                                | -0.414        | -0.380      | -0.476      |
| TMPFTB              | reduction factor of CO <sub>2</sub> assimilation rate as function of average daily temperature (at 10 °C and 26 °C) |                                                | 0.75          | 0.64        | 0.86        |
| FRFB                | dry matter partitioning to roots                                                                                    | %                                              | 0.2           | 0.17        | 0.23        |
| FOTBa               | regulates steepness of dry matter partitioning function to storage organs                                           |                                                | 7             | 5.95        | 8.05        |
| FOTBb               | regulates location of centre point of dry matter partitioning function to storage organs                            |                                                | 1.05          | 0.89        | 1.21        |
| FOTBc               | regulates fraction of dry matter partitioning function to storage organs at DVS=2                                   |                                                | 1             | 0.85        | 1.15        |
| FLTBa               | regulates steepness of dry matter partitioning function to leaves                                                   |                                                | 20            | 17          | 23          |
| FLTBb               | regulates location of centre point of dry matter partitioning function to leaves                                    |                                                | 1.05          | 0.89        | 1.21        |
| FLTBc               | regulates fraction of dry matter partitioning to leaves at DVS=0                                                    |                                                | 0.83          | 0.71        | 0.95        |

## S2 Calibrated biomass partitioning

**Table S2.** Values for the partitioning functions over DVS, derived by the calibration of the function parameters FOTBc, FLTBc and FLTBb

| Parameter | Definition                                                   | Default   | Optimized | DVS  |
|-----------|--------------------------------------------------------------|-----------|-----------|------|
| FOTB      | dry matter partitioning to storage organs as function of DVS | 0         | 0         | 0    |
|           |                                                              | 0.4133842 | 0.413415  | 1    |
|           |                                                              | 0.8234647 | 0.823430  | 1.27 |
|           |                                                              | 0.8975230 | 0.897594  | 1.36 |
|           |                                                              | 1         | 1         | 2    |
| FLTB      | dry matter partitioning to leaves as function of DVS         | 0.83000   | 0.94838   | 0    |
|           |                                                              | 0.5866170 | 0.130745  | 1    |
|           |                                                              | 0.0100666 | 0         | 1.27 |
|           |                                                              | 0         | 0         | 1.36 |
|           |                                                              | 0         | 0         | 2    |
| FSTB      | dry matter partitioning to stem as function of DVS           | 0.17000   | 0.05162   | 0    |
|           |                                                              | 0         | 0.455840  | 1    |
|           |                                                              | 0.1664687 | 0.176470  | 1.27 |
|           |                                                              | 0.1024770 | 0.102406  | 1.36 |
|           |                                                              | 0         | 0         | 2    |

## S3 Subsample results with and without irrigation bans

**Table S3.** \* indicates a significant deviation, tested with the wilcoxon rank sum test (wilcox.test function of the R package stats)

| Scenario              | Maturity, growing season length (d) | Irrigation ban | SOC +1% in-creased | Mean yield (dt ha <sup>-1</sup> ) | Δ in yield relative to reference scenario I/II (%) | Mean irrigation amount (mm) | Δ in irrigation amount relative to reference scenario I/II (%) | Cumulative seasonal transpiration (mm) | Mean transpiration gain* relative to reference scenario I/II (mm) | Irrigation water productivity (kg mm <sup>-1</sup> ) |
|-----------------------|-------------------------------------|----------------|--------------------|-----------------------------------|----------------------------------------------------|-----------------------------|----------------------------------------------------------------|----------------------------------------|-------------------------------------------------------------------|------------------------------------------------------|
| reference scenario I  | 140                                 |                |                    | 298                               |                                                    | 120                         |                                                                | 211.4                                  |                                                                   | 2.5                                                  |
| reference scenario II | 140                                 | x              |                    | 251                               |                                                    | 54                          |                                                                | 183.7                                  |                                                                   | 4.6                                                  |
| 3                     | 140                                 | x              |                    | 340                               | 14*                                                | 126                         | 5*                                                             | 236.7                                  | 4.2                                                               | 2.8                                                  |
| 4                     |                                     | x              | x                  | 287                               | 14*                                                | 57                          | 6*                                                             | 204.5                                  | 0.3                                                               | 5.4                                                  |
| 5                     | 130                                 |                |                    | 269                               | -10*                                               | 112                         | -7                                                             | 195.2                                  | 2.9                                                               | 2.4                                                  |
| 6                     |                                     | x              |                    | 234                               | -7*                                                | 53                          | -2                                                             | 171.4                                  | 7.4                                                               | 4.4                                                  |
| 7                     |                                     |                | x                  | 308                               | 3                                                  | 117                         | -3                                                             | 216.3                                  | 4.9                                                               | 2.6                                                  |
| 8                     |                                     | x              | x                  | 269                               | 7*                                                 | 53                          | -2*                                                            | 191.0                                  | 7.9                                                               | 5.1                                                  |
| 9                     | 120                                 |                |                    | 239                               | -20*                                               | 100                         | -17*                                                           | 177.3                                  | 6.1                                                               | 2.4                                                  |
| 10                    |                                     | x              |                    | 214                               | -15*                                               | 47                          | -13*                                                           | 159.1                                  | 15.4                                                              | 4.6                                                  |
| 11                    |                                     |                | x                  | 273                               | -8*                                                | 105                         | -13*                                                           | 199.2                                  | 7.3                                                               | 2.6                                                  |
| 12                    |                                     | x              | x                  | 246                               | -2                                                 | 47                          | -13                                                            | 175.8                                  | 15.6                                                              | 5.2                                                  |
| 13                    | 110                                 |                |                    | 204                               | -32*                                               | 88                          | -27*                                                           | 153.9                                  | 10                                                                | 2.3                                                  |
| 14                    |                                     | x              |                    | 188                               | -25*                                               | 38                          | -30*                                                           | 143.6                                  | 29.9                                                              | 4.9                                                  |
| 15                    |                                     |                | x                  | 232                               | -22*                                               | 92                          | -23*                                                           | 175.9                                  | 11.8                                                              | 2.5                                                  |
| 16                    |                                     | x              | x                  | 215                               | -14*                                               | 41                          | -24*                                                           | 155.9                                  | 30.7                                                              | 5.2                                                  |

## **S4 Regional results with and without irrigation bans**

**Table S4.** Regional modeling results for 2022 with and without considering irrigation bans. Transpiration gain = how much more water is transpired in relation to a reference scenario (drought-induced transpiration reduction reference - drought-induced transpiration reduction scenario)

| Scenario                        | Maturity, growing season length (d) | SOC +1% increased | Total irrigation amount (m <sup>3</sup> ) | Δ in irrigation amount relative to reference scenario 2 (%) | total yield (dt) | Δ in yield relative to reference scenario 2 (%) | Irrigation water productivity (dt m <sup>-3</sup> ) | transpiration gain* relative to reference scenario 1 / 2 (mm) |
|---------------------------------|-------------------------------------|-------------------|-------------------------------------------|-------------------------------------------------------------|------------------|-------------------------------------------------|-----------------------------------------------------|---------------------------------------------------------------|
| not considering Irrigation bans |                                     |                   |                                           |                                                             |                  |                                                 |                                                     |                                                               |
| reference scenario 1            | 140                                 |                   | 697389                                    |                                                             | 184940           |                                                 | 0.27                                                |                                                               |
| 3                               | 140                                 | x                 | 706948                                    | 1                                                           | 205337           | 11                                              | 0.29                                                | 27964                                                         |
| 7                               | 130                                 | x                 | 676818                                    | -3                                                          | 173525           | -6                                              | 0.26                                                | 14280                                                         |
| 11                              | 120                                 | x                 | 604560                                    | -13                                                         | 153990           | -17                                             | 0.25                                                | 27639                                                         |
| 15                              | 110                                 | x                 | 531137                                    | -24                                                         | 130456           | -29                                             | 0.25                                                | 50610                                                         |
| best scenario                   | all                                 | (x)               | 635101                                    | -9                                                          | 188907           | 2                                               | 0.3                                                 | 84797                                                         |
| considering irrigation bans     |                                     |                   |                                           |                                                             |                  |                                                 |                                                     |                                                               |
| reference scenario 2            | 140                                 |                   | 285836                                    |                                                             | 154518           |                                                 | 0.54                                                |                                                               |
| 4                               | 140                                 | x                 | 280367                                    | -2                                                          | 171951           | 11                                              | 0.61                                                | -676                                                          |
| 8                               | 130                                 | x                 | 308692                                    | 8                                                           | 150842           | -2                                              | 0.49                                                | 58476                                                         |
| 12                              | 120                                 | x                 | 281643                                    | -2                                                          | 137934           | -11                                             | 0.49                                                | 118767                                                        |
| 16                              | 110                                 | x                 | 238512                                    | -17                                                         | 121250           | -22                                             | 0.51                                                | 190598                                                        |
| best scenario                   | all                                 | (x)               | 212507                                    | -26                                                         | 157523           | 2                                               | 0.74                                                | 299456                                                        |
